# Supplementary material for: A CRISPR-Cas12a-Based Diagnostic Method for Japanese Encephalitis Virus Genotypes I, III, and V
Source: MDPI journal article supplement (doi:10.3390/bios13080769), 2023-07-28
Supplement: s1 [file s1]

Supplementary data

# A CRISPR-Cas12a-based diagnostic method for Japanese encephalitis virus genotypes I, III, and V

Supplementary data

Table S1. Primers for *in vitro* transcription

| Genotype     | Primer        | Sequence                                              |
|--------------|---------------|-------------------------------------------------------|
| Genotype I   | T7-JEV-GI-F   | TAATACGACTCACTATAGGGAGAGACAGCAGCTACGTGTGCAAACAAGGCTTT |
|              | T7-JEV-GI-R   | CCGAGGTGGTGGTTCCGTGCACGAATATGCCAACCT                  |
| Genotype III | T7-JEV-GIII-F | TAATACGACTCACTATAGGGAGACTGACTGGATTGCCAAGCAT           |
|              | T7-JEV-GIII-R | GAATTCCAAACGGCACTGGCTCCATTGTCCC                       |
| Genotype V   | T7-JEV-GV-F   | TAATACGACTCACTATAGGGAGAATGACGTGGAGGCTTG               |
|              | T7-JEV-GV-R   | GCAAAGAGAATGCTCTTCCCCCATGC                            |

### A. JEV GI RPA primer alignment

|             |                                      |      |
|-------------|--------------------------------------|------|
|             | 1237                                 | 1266 |
| GI F-primer | 5'-GACAGCAGCTACGTGTGCAAACAAGGCTTT-3' |      |
| JEV GI      | 5'-GACAGCAGCTACGTGTGCAAACAAGGCTTT-3' |      |
| JEV GIII    | 5'-GATAGTAGCTATGTGTGCAAACAAGGCTTC-3' |      |
| JEV GV      | 5'-GACAGCAGCTACGTCTGCAAGCAAGGCTAT-3' |      |
|             | 1426                                 | 1397 |
| GI R-primer | 5'-CCGAGGTGGTGGTTCCGTGCACGAATATGC-3' |      |
| JEV GI      | 5'-CCGAGGTGGTGGTTCCGTGCACGAATATGC-3' |      |
| JEV GIII    | 5'-CCGAAGTGGTGGTTCCATGCACAAAATAC-3'  |      |
| JEV GV      | 5'-CTGCTGTTGTGGTTCCATGAACAAACACTC-3' |      |

### B. JEV GIII RPA primer alignment

|               |                                      |      |
|---------------|--------------------------------------|------|
|               | 7156                                 | 7185 |
| GIII F-primer | 5'-TGCCACGAGGCGTGCCTTTTACCGACCTAG-3' |      |
| JEV GI        | 5'-TGCCGCGAGGCGTGCCTTTCACTGACTTGG-3' |      |
| JEV GIII      | 5'-TGCCACGAGGCGTGCCTTTTACCGACCTAG-3' |      |
| JEV GV        | 5'-TTTTGCCAAAAGGCATGCCTTTTACGGATT-3' |      |
|               | 7334                                 | 7305 |
| GIII R-primer | 5'-TGTCTTCTCTGGGCAGCCCTGAGTGCTTC-3'  |      |
| JEV GI        | 5'-TGTCTTCTCTGAGCAGCTCTGAGTGCCTC-3'  |      |
| JEV GIII      | 5'-TGTCTTCTCTGGGCAGCCCTGAGTGCTTC-3'  |      |
| JEV GV        | 5'-CCGTCTCTGAGCTGCCCTCAGGGCTTCAGC-3' |      |

### C. JEV GV RPA primer alignment

|             |                                      |      |
|-------------|--------------------------------------|------|
|             | 2630                                 | 2659 |
| GV F-primer | 5'-GGAAGGCATTTGTGGAGTGAGTCAGTCAC-3'  |      |
| JEV GI      | 5'-AGAAGGAGTGTGCGGGGTCAGATCCGTCAC-3' |      |
| JEV GIII    | 5'-GGAAGGAGTGTGCGGAGTCAGATCTGTCAC-3' |      |
| JEV GV      | 5'-GGAAGGCATTTGTGGAGTGAGTCAGTCAC-3'  |      |
|             | 2782                                 | 2753 |
| GV R-primer | 5'-AATGGAGCTGGTCGGTATCTTCCTGATGGT-3' |      |
| JEV GI      | 5'-TTGGGGGCTGAGCGATATCTCCCCACGGGC-3' |      |
| JEV GIII    | 5'-TTAGGGGCTGAGCGATATCTTCACGGGC-3'   |      |
| JEV GV      | 5'-AATGGAGCTGGTCGGTATCTTCCTGATGGT-3' |      |

**Figure S1.** Alignment of RT-RPA primers with target sequences of JEV genotypes. The nucleic acid sequences of primer sets for one genotype are aligned with those of other genotypes analyzed in this study. All reverse primers are in the reverse-complement orientation.

### A. JEV GI gRNA alignment

|             |      |                             |      |
|-------------|------|-----------------------------|------|
|             | 1304 |                             | 1285 |
|             |      | PAM                         |      |
| GI PAM/gRNA | 5'-  | TTTCCCGAAAAGTCCACATCCATT-3' |      |
| JEV GI      | 5'-  | TTTCCCGAAAAGTCCACATCCATT-3' |      |
| JEV GIII    | 5'-  | CTTCCCGAAAAGTCCACATCCGTT-3' |      |
| JEV GV      | 5'-  | TTTCCCAACAACCCACATCCGTT-3'  |      |

### B. JEV GIII gRNA alignment

|               |      |                             |      |
|---------------|------|-----------------------------|------|
|               | 7223 |                             | 7204 |
|               |      | PAM                         |      |
| GIII PAM/gRNA | 5'-  | TTTGACCCCAACAGCCAAGGAAGA-3' |      |
| JEV GI        | 5'-  | TTTGACCCCAACAGCCAAGGAAGA-3' |      |
| JEV GIII      | 5'-  | TTTGACCCCAACAGCCAAGGAAGA-3' |      |
| JEV GV        | 5'-  | GCCCCAACAGCCCAGAAAGACAA-3'  |      |

### C. JEV GV gRNA alignment

|             |      |                              |      |
|-------------|------|------------------------------|------|
|             | 2749 |                              | 2730 |
|             |      | PAM                          |      |
| GV PAM/gRNA | 5'-  | TTTGTCCACCACCACACTAAGATC-3'  |      |
| JEV GI      | 5'-  | CTTGTTCCACCACCACACTGAGATC-3' |      |
| JEV GIII    | 5'-  | CTTGTTCAACAACCACACTGAGGTC-3' |      |
| JEV GV      | 5'-  | TTTGTCCACCACCACACTAAGATC-3'  |      |

**Figure S2.** Alignment of gRNAs with target sequences of JEV genotypes. Nucleic acid sequence of gRNA for one genotype is aligned with those of other genotypes analyzed in this study. All gRNAs are in the reverse-complement orientation.
